# Supplementary material
Source: PubMed Central journal article supplement (PMC3836566)
Supplement: NIHMS530200-supplement-1_si_001.pdf [file NIHMS530200-supplement-1_si_001.pdf]

## Supporting Information

### Inhibition of thyroid hormone sulfotransferase activity by brominated flame retardants and halogenated phenolics

Craig M. Butt and Heather M. Stapleton

#### Figures

**Figure S1.** Formation rate (pmol/mg protein) of 3,3'-T2 sulfate resulting from the incubation of 1  $\mu$ M 3,3'-T2 in 0.25 mg protein/ml of pooled human liver cytosol as a function of time. Line of best fit obtained by linear regression analysis. Each data point represents the mean (n=3) and error bars represent 1 standard error.

**Figure S2.** Formation rate (pmol/min) of 3,3'-T2 sulfate resulting from the incubation of 1  $\mu$ M 3,3'-T2 in pooled human liver cytosol for 30 min as a function of protein concentration. Line of best fit obtained by linear regression analysis. Each data point represents the mean (n=3) and error bars represent 1 standard error.

**Figure S3.** IC<sub>50</sub> concentration (nM) versus A) number of bromines, B) OH-group substitution, C) number of bromines adjacent to OH-group and D) pKa for OH-BDEs for incubation of 1  $\mu$ M 3,3'-T2 in pooled human liver cytosol.

**Figure S4.** Interaction energy (kJ/mol) versus A) number of bromines ( $r^2 = 0.40$ ,  $p < 0.05$ ), B) OH-group substitution, C) number of bromines adjacent to OH-group and D) pKa ( $r^2 = 0.45$ ,  $p < 0.01$ ) for SULT1A1 binding of OH-BDEs as determined by docking simulation.

**Figure S5.** IC<sub>50</sub> concentration (nM) versus interaction energy (kJ/mol) for 3,3'-T2 sulfotransferase inhibition by OH-BDEs. Regression line excludes 4'-OH BDE49, 4'-OH BDE 101, 4'-OH BDE 201.

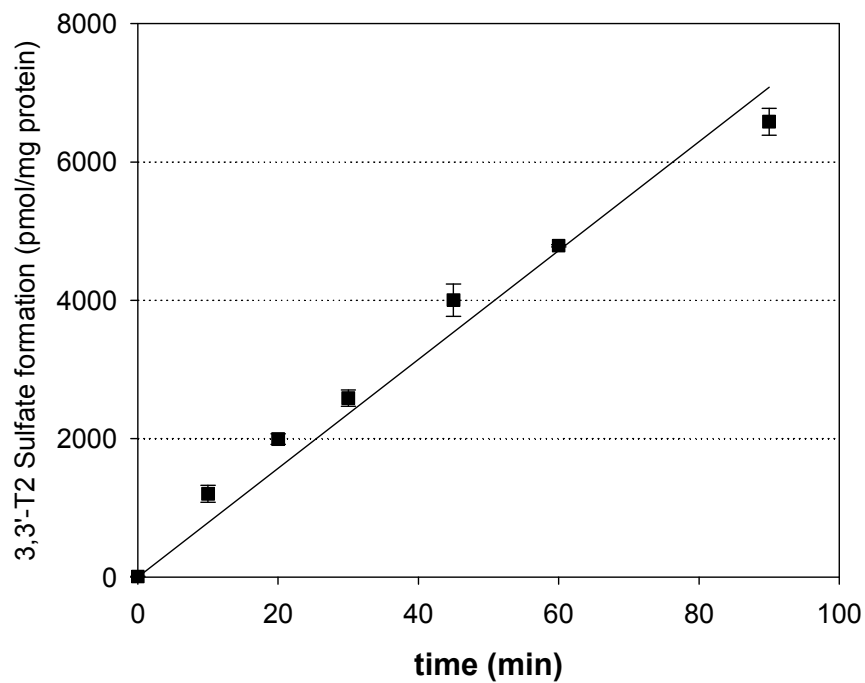

**Figure S1.** Formation rate (pmol/mg protein) of 3,3'-T2 sulfate resulting from the incubation of 1  $\mu$ M 3,3'-T2 in 0.25 mg protein/ml of pooled human liver cytosol as a function of time. Line of best fit obtained by linear regression analysis. Each data point represents the mean (n=3) and error bars represent 1 standard error.

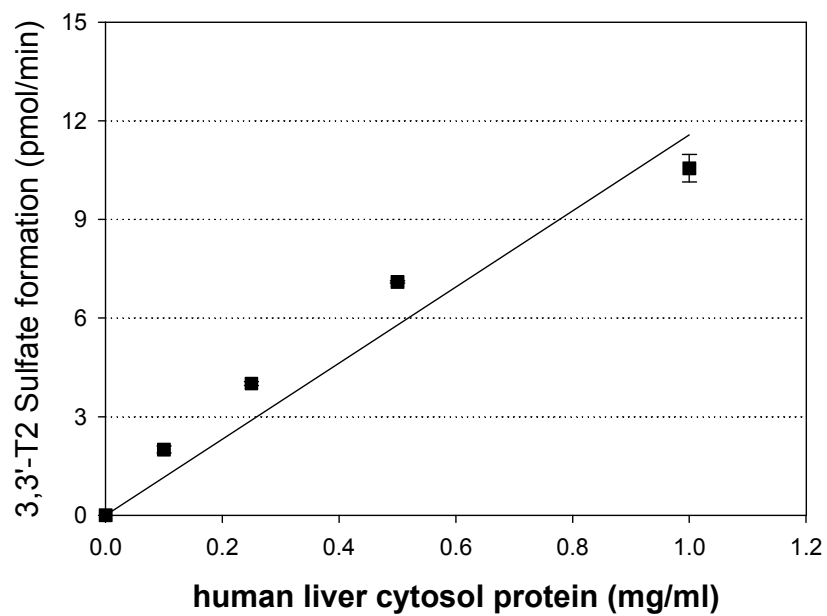

**Figure S2.** Formation rate (pmol/min) of 3,3'-T2 sulfate resulting from the incubation of 1  $\mu$ M 3,3'-T2 in pooled human liver cytosol for 30 min as a function of protein concentration. Line of best fit obtained by linear regression analysis. Each data point represents the mean (n=3) and error bars represent 1 standard error.

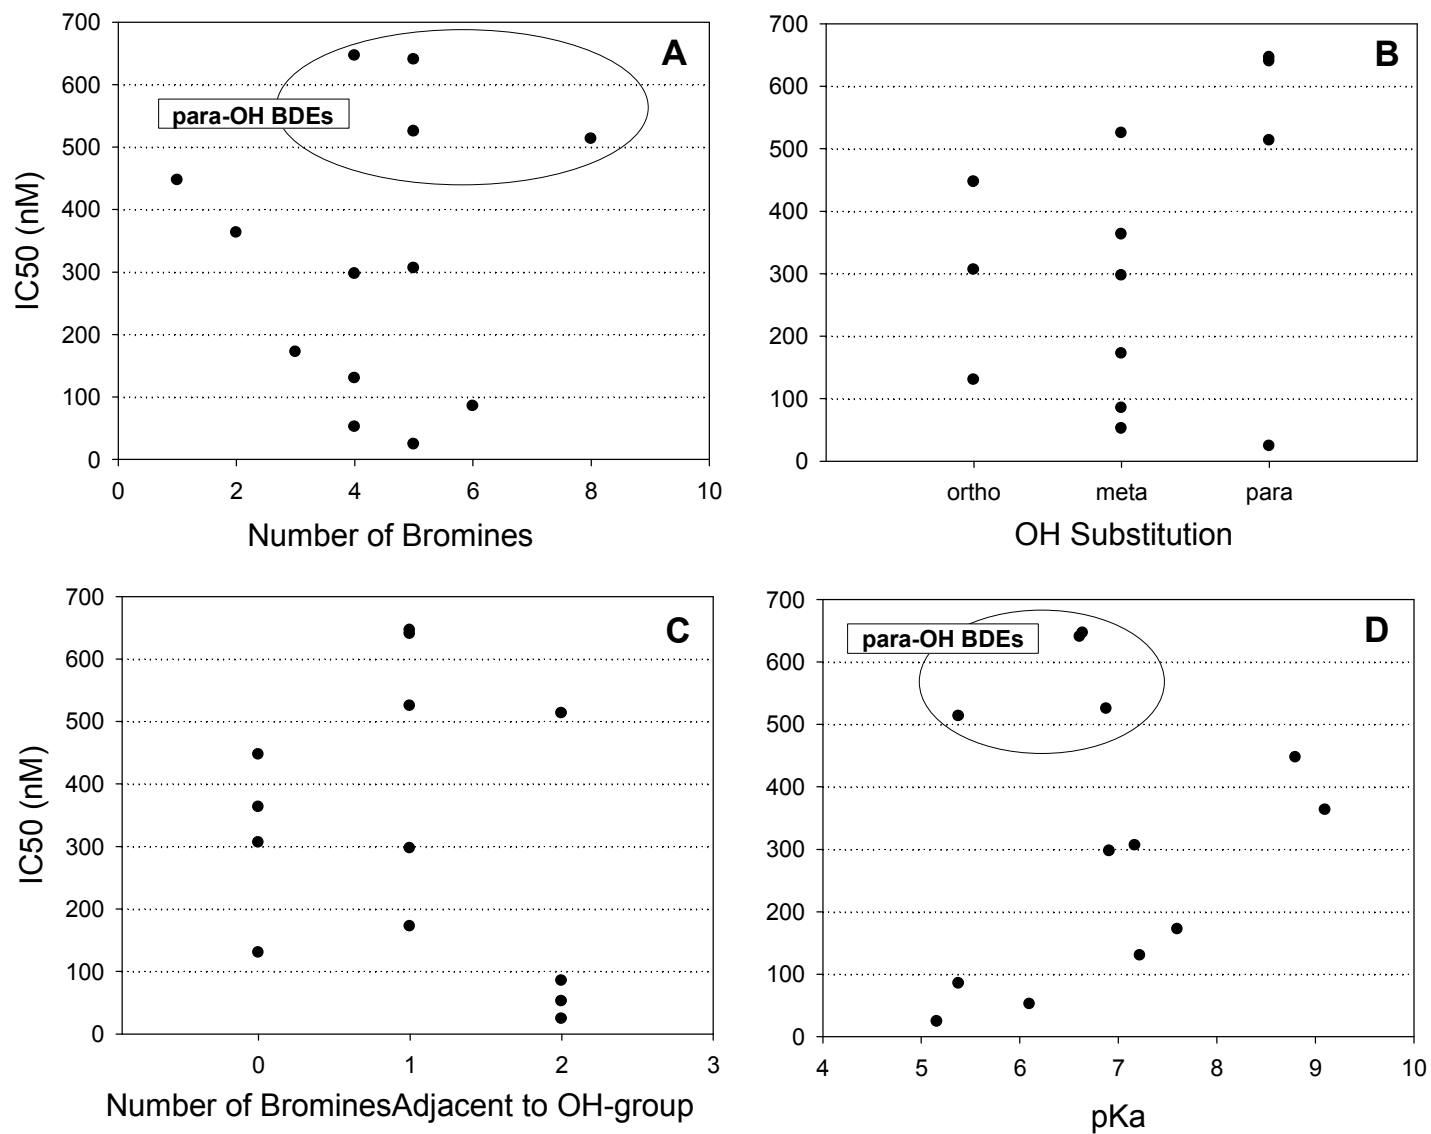

**Figure S3.** IC<sub>50</sub> concentration (nM) versus A) number of bromines, B) OH-group substitution, C) number of bromines adjacent to OH-group and D) pKa for OH-BDEs for incubation of 1  $\mu$ M 3,3'-T2 in pooled human liver cytosol.

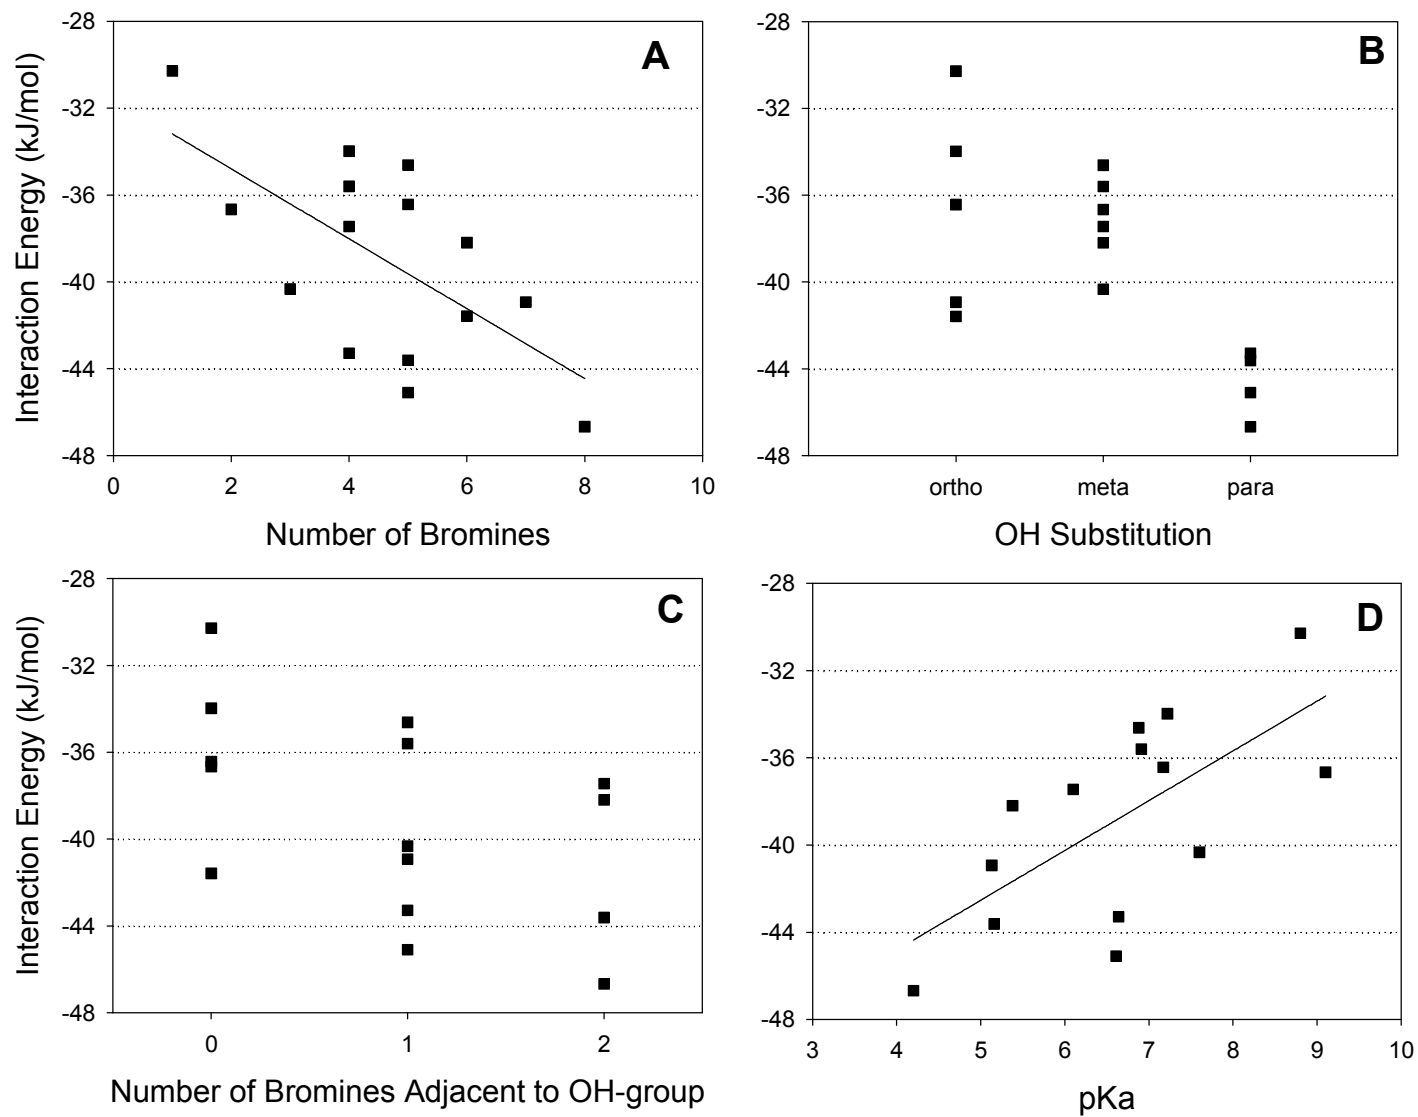

**Figure S4.** Interaction energy (kJ/mol) versus A) number of bromines ( $r^2 = 0.40$ ,  $p < 0.05$ ), B) OH-group substitution, C) number of bromines adjacent to OH-group and D) pKa ( $r^2 = 0.45$ ,  $p < 0.01$ ) for SULT1A1 binding of OH-BDEs as determined by docking simulation.

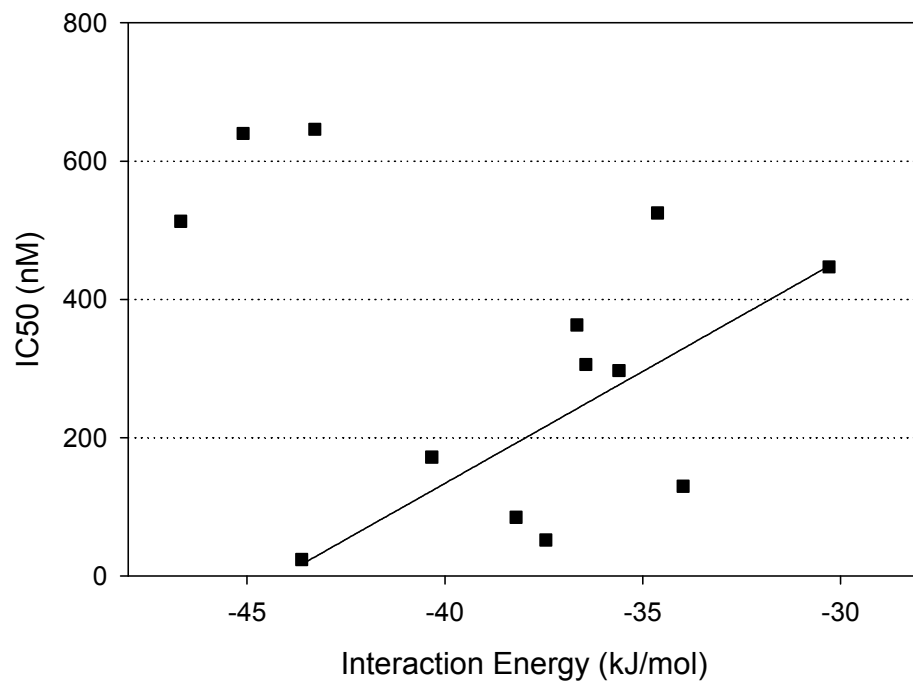

**Figure S5.** IC<sub>50</sub> concentration (nM) versus interaction energy (kJ/mol) for 3,3'-T2 sulfotransferase inhibition by OH-BDEs. Regression line excludes 4'-OH BDE49, 4'-OH BDE 101, 4'-OH BDE 201 ( $r^2 = 0.46$ ,  $p < 0.05$ ).
